# Supplementary material for: Structural basis for tRNA-dependent sterol aminoacylation underlying cell membrane integrity
Source: Research Square preprint supplement (doi:10.21203/rs.3.rs-7291846/v1), 2025-08-22
Supplement: Supplementary file 1 [file d150eeae026872115dc5500f.xlsx]

## Sheet: Oligonucleotides
Plasmid	gene	Primer code	Sequence	region amplified/mutated	template
-	-	FF#060	5’-TTGAGTACTCACCAGTCACAGAAAAGC	ampicillin resistance gene	E. coli plasmids	Forward	ErdS mutagenesis
-	-	FF#061	5’-TTTTCTGTGACTGGTGAGTACTCAACC	ampicillin resistance gene	E. coli plasmids	Reverse
pRS415-Afm erdS a(0)	erdS (Afm)	FF#050	5’-GCAGCAGCAATAGCAGCAGCCGAAAACGAAGGTATTAAAATCG	erdS	A. fumigatus (optimized sequence for S. cerevisiae)	Forward
		FF#051	5’-GCTGCTGCTATTGCTGCTGCAATTTCACCGTCAGAAGCGGCTTG			Reverse
pRS415-Afm erdS a(-)	erdS (Afm)	FF#052	5’-GCAGAAGAAATAGAAGAAGCCGAAAACGAAGGTATTAAAATCG	erdS	A. fumigatus (optimized sequence for S. cerevisiae)	Forward
		FF#053	5’- GGCTTCTTCTATTTCTTCTGCAATTTCACCGTCAGAAGCGGCTTG			Reverse
pRS415-Afm erdS Y637F	erdS (Afm)	NY050	5'-GATCGCCAACTTTGGTGACGCTACAAGTACC	erdS	A. fumigatus (optimized sequence for S. cerevisiae)	Forward
		NY051	5'-TAGCGTCACCAAAGTTGGCGATCAAATGTTC			Reverse
pRS415-Afm erdS T641A	erdS (Afm)	NY052	5'-CGGTGACGCTGCTAGTACCTCTTGGGGTGACG	erdS	A. fumigatus (optimized sequence for S. cerevisiae)	Forward
		NY053	5'-AAGAGGTACTAGCAGCGTCACCGTAGTTGGC			Reverse
pRS415-Afm erdSS642A	erdS (Afm)	NY054	5'-TGACGCTACAGCTACCTCTTGGGGTGACG	erdS	A. fumigatus (optimized sequence for S. cerevisiae)	Forward
		NY055	5'-CCCAAGAGGTAGCTGTAGCGTCACCGTAG			Reverse
pRS415-Afm erdSS642A	erdS (Afm)	NY056	5'-CGCTACAAGTGCTTCTTGGGGTGACGAAAG	erdS	A. fumigatus (optimized sequence for S. cerevisiae)	Forward
		NY057	5'-CACCCCAAGAAGCACTTGTAGCGTCACCG			Reverse
pRS415-Afm erdSS644A	erdS (Afm)	NY058	5'-TACAAGTACCGCTTGGGGTGACGAAAGATTC	erdS	A. fumigatus (optimized sequence for S. cerevisiae)	Forward
		NY059	5'-CGTCACCCCAAGCGGTACTTGTAGCGTCACC			Reverse
pRS415-Afm erdS W645A	erdS (Afm)	NY060	5'-AAGTACCTCTGCTGGTGACGAAAGATTCAAG	erdS	A. fumigatus (optimized sequence for S. cerevisiae)	Forward
		NY061	5'-TTTTCTGTGACTGGTGAGTACTCAACC			Reverse
pRS415-Afm erdS D647A	erdS (Afm)	NY062	5'-CTCTTGGGGTAGAGAAAGATTCAAGATTTGG	erdS	A. fumigatus (optimized sequence for S. cerevisiae)	Forward
		NY063	5'-TGAATCTTTCTCTACCCCAAGAGGTACTTG			Reverse
pRS415-Afm erdS R649E	erdS (Afm)	NY064	5'-GGGTGACGAAGAATTCAAGATTTGGAGAGAC	erdS	A. fumigatus (optimized sequence for S. cerevisiae)	Forward
		NY065	5'-AAATCTTGAATTCTTCGTCACCCCAAGAGG			Reverse
pRS415-Afm erdS N677A	erdS (Afm)	FF#134	5'-TATTCCAGGTgccCCTTTGTGTGATCCTTCTC	erdS	A. fumigatus (optimized sequence for S. cerevisiae)	Forward
		FF#135	5'-CACACAAAGGggcACCTGGAATAACAGCGTAG			Reverse
pRS415-Afm erdS E712R	erdS (Afm)	FF#136	5'-ATGTAGTCCTagaGTTGAATCTATCTTAGGTGAC	erdS	A. fumigatus (optimized sequence for S. cerevisiae)	Forward
		FF#137	5'-TAGATTCAACtctAGGACTACATAACAACCATATTGG			Reverse
pRS415-Afm erdS C728A	erdS (Afm)	NY070	5'-ATCATTGTCCGCTATTGCTGAAGAAAGAGTAG	erdS	A. fumigatus (optimized sequence for S. cerevisiae)	Forward
		NY071	5'-CTTCAGCAATAGCGGACAATGATCTCCAACC			Reverse
pRS415-Afm erdS E731R		FF#138	5'-CTGCATTGCTagaGAAAGAGTAGATCCAAGTAG	erdS	A. fumigatus (optimized sequence for S. cerevisiae)	Forward
		FF#139	5'-CTACTCTTTCtctAGCAATGCAGGACAATGATC			Reverse
pRS415-Afm erdS W785A	erdS (Afm)	FF#054	5’-ATACAAGATGCTTTGGCAAACAGAAAGGGTACTCAAGTTC	erdS	A. fumigatus (optimized sequence for S. cerevisiae)	Forward
		FF#055	5’-GTTTGCCAAAGCATCTTGTATTCTAGCGTCAATCTTTTC			Reverse
pRS415-Afm erdS W785H	erdS (Afm)	FF#056	5’-ATACAAGATCATTTGGCAAACAGAAAGGGTACTCAAGTTC	erdS	A. fumigatus (optimized sequence for S. cerevisiae)	Forward
		FF#057	5’-GTTTGCCAAATGATCTTGTATTCTAGCGTCAATCTTTTC			Reverse
pRS415-Afm erdS R789A	erdS (Afm)	FF#058	5’-TTGGCAAACGCAAAGGGTACTCAAGTTCATTTGTCAGAAATAC	erdS	A. fumigatus (optimized sequence for S. cerevisiae)	Forward
		FF#059	5’-AGTACCCTTTGCGTTTGCCAACCAATCTTGTATTCTAGCGTC			Reverse
pRS415-Afm erdS K790E	erdS (Afm)	NY072	5'-GGCAAACAGAGAAGGTACTCAAGTTCATTTG	erdS	A. fumigatus (optimized sequence for S. cerevisiae)	Forward
		NY073	5'-CTTGAGTACCTTCTCTGTTTGCCAACCAATC			Reverse
pRS415-Afm erdS G791A	erdS (Afm)	NY074	5'-AAACAGAAAGGCTACTCAAGTTCATTTGTC	erdS	A. fumigatus (optimized sequence for S. cerevisiae)	Forward
		NY075	5'-GAACTTGAGTAGCCTTTCTGTTTGCCAACC			Reverse
pRS415-Afm erdS Q793R	erdS (Afm)	NY076	5'-AAAGGGTACTAGAGTTCATTTGTCAGAAATAC	erdS	A. fumigatus (optimized sequence for S. cerevisiae)	Forward
		NY077	5'-ACAAATGAACTCTAGTACCCTTTCTGTTTGC			Reverse
pRS415-Afm erdS H795A	erdS (Afm)	NY078	5'-TACTCAAGTTGCTTTGTCAGAAATACACCCTTG	erdS	A. fumigatus (optimized sequence for S. cerevisiae)	Forward
						Reverse
		NY079	5'-TTTCTGACAAAGCAACTTGAGTACCCTTTCTG			Forward
pRS415-Afm erdS E798R	erdS (Afm)	NY080	5'-TCATTTGTCAAGAATACACCCTTGGAGAGATTC	erdS	A. fumigatus (optimized sequence for S. cerevisiae)	Reverse
		NY081	5'-AAGGGTGTATTCTTGACAAATGAACTTGAGTAC			Forward
pRS415-Afm erdS W802A	erdS (Afm)	NY082	5'-AATACACCCTGCTAGAGATTCCGAACATAGATG	erdS	A. fumigatus (optimized sequence for S. cerevisiae)	Reverse
		NY083	5'-CGGAATCTCTAGCAGGGTGTATTTCTGACAAATG			Forward
pRS415-Afm erdS Q836R	erdS (Afm)	FF#140	5'-CTTCGGTATGagaGTTAAGTACTCATTCGATTTCC	erdS	A. fumigatus (optimized sequence for S. cerevisiae)	Reverse
		FF#141	5'-AGTACTTAACtctCATACCGAAGTGTGGAGACAAC			Forward
pRS415-Afm erdS K838E	erdS (Afm)	FF#142	5'-TATGCAGGTTgaaTACTCATTCGATTTCCCAGG	erdS	A. fumigatus (optimized sequence for S. cerevisiae)	Reverse
		FF#143	5'-CGAATGAGTAttcAACCTGCATACCGAAGTGTGG			Forward
pRS415-Afm erdS F913A	erdS (Afm)	NY084	5'-AAAATCAGAGGCTAGAGCCAAGTTAGGTGCTC	erdS	A. fumigatus (optimized sequence for S. cerevisiae)	Forward
		NY085	5'-ACTTGGCTCTAGCCTCTGATTTTCTAACCAAG			Reverse
pRS415-Afm erdS K916E	erdS (Afm)	NY088	5'-GTTTAGAGCCGAATTAGGTGCTCATGAAGAAC	erdS	A. fumigatus (optimized sequence for S. cerevisiae)	Forward
		NY089	5'-GAGCACCTAATTCGGCTCTAAACTCTGATTTTC			Reverse
pRS415-Afm erdS D(1-30)	erdS (Afm)	FF#128	5'-ATGAGTATTTTCTCTTCATTTTTGAG	DN(1-30)-erdS Afm	A. fumigatus (optimized sequence for S. cerevisiae)	Forward
		FF#129	5'-CTCAAAAATGAAGAGAAAATACTCAT			Reverse
pRS415-Afm erdS D(1-60)	erdS (Afm)	FF#130	5'-ATGGGGAGAAACCAACAAAAGAGATTGGC	DN(1-60)-erdS Afm	A. fumigatus (optimized sequence for S. cerevisiae)	Forward
		FF#131	5'-GCCAATCTCTTTTGTTGGTTTCTCCCCAT			Reverse
pRS415-Afm erdS D(1-84)	erdS (Afm)	FF#132	5'-ATGTCAGATGACTCCGAAAGAAGAC	DN(1-84)-erdS Afm	A. fumigatus (optimized sequence for S. cerevisiae)	Forward
		FF#133	5'-GTCTTCTTTCGGAGTCATCTGACAT			Reverse
pRS415-Aor erdS D(1-90)	erdS (Aor)	aodN_s#287	5'-caagtttGTACAAAAAAGCAGGCTTCATGGGTTCTGAGACTGCAGAGATGAAGGCTC	Aor erdS	pRS415-Aor erdS	Forward
		aodN_as#288	5'-GAAGCCTGCTTTTTTGTACaaacttg			Reverse
p(hygro)-Pxyl-erdS		FF#263	5'-CCCGGGTACGTTGGTACGTGAAAGAAATGGGCTTTC	5'-UTR erdS Afm	A. fumigatus	forward	Other constructions
		FF#264	5'-CCCGGGTACGCCGCCTCCCTTCCCATTGCAATC	3'-UTR erdS Afm		reverse
		FF#267	5'-GGTGACGGATGAGAGACCACCTAGATTG	Reverse oligo to amplify from the end of 5'-UTR in deletion cassette (hygro)	plasmid p(hygro)-DerdS	reverse
		FF#268	5'-GGATCCCCGACGCCGACCAACACCGCC	Forward oligo to amplify from the end of 5'-UTR in deletion cassette (hygro)		forward
		FF#271	5'-CAAAGCACGTTTGATCGACATCTGCAgttggttcttcgagtcgatgaatg	PXyl promoter reverse primer		reverse
		FF#272	5'-TGCACTTCTTTGAAGACTAAGGATCCCCGACGCCGACCAACACCGCC	TrpC terminator		forward
		FF#273	5-ATGTCGATCAAACGTGCTTTGTCTAAG	erdS amplification (from ATG to STOP)	A. fumigatus	forward
		FF#274	5'-TTAGTCTTCAAAGAAGTGCAGAACCG	erdS amplification (from ATG to STOP)		reverse
-		FF#684	5'-GGAGATTGGATATGGATGAAGTGAAC	verification of the erdS locus	A. fumigatus	forward
-		FF#695	5'-GTTGCCAACGTCGAGAAAACC	verification of the erdS locus	A. fumigatus	reverse
-		NY#015	5'-GAGCTGATGCTTTGGGCCGAGGACTGC	verification of the erdS locus	A. fumigatus	forward
-		NY#016	5'-GCAGTCCTCGGCCCAAAGCATCAGCTC	verification of the erdS locus	A. fumigatus	reverse
-		sgErdS	TTCTAATACGACTCACTATAGTAAGTTCCTGCTCCTGCAAGGTTTTAGAGCTAGA	ErdS and ErdH target specific oligos used as template for sgRNA synthesis using EnGen® sgRNA Synthesis Kit (NEB #3322)	M. oryzae
-		sgErdH	TTCTAATACGACTCACTATAGCTTGGACCAAAGTCCTCGATGTTTTAGAGCTAGA		M. oryzae
-		NY155	AATTCATTAACCCAGGGCCCTGTATCACCATAATCACGAGCTTCCAGCCCATTAGTCCCCACAATGCACTCAGAAGATGATATTGAAGGAGCACTTTTTG	Generating ErdS repair DNA: PCR amplification of the BAR cassette flanked by homologous sequences whithin the ErdS locus.	M. oryzae	forward
-		NY156	AGCGATGATGATTCCTACCGCAGTGACAGCTTGGAGAGGAAGGCACGGAAGGAGGCCGACAAGCTCGAGCGCCGCTCTAAATCTCGGTGACGGGCAG		M. oryzae	reverse
-		NY157	TCGCCCTCACCCGGCACCGCTACCAGCCCACCAGAAGATGGTGACACAGCGGATGACTATGTGAACCCCTCAGAAGATGATATTGAAGGAGCACTTTTTG	Generating ErdH repair DNA: PCR amplification of the BAR cassette flanked by homologous sequences whithin the ErdH locus.	M. oryzae	forward
-		NY158	CATGTATAGGTATATACATTCTATATGGCGCAGAACAATCCAGTTAGCTAATCCAACCCAACCCAGGTCTTCAGCCTAAATCTCGGTGACGGGCAG		M. oryzae	reverse
-		NY159	TTGCGTATTTCTGAGGTGAGG	Primers used for diagnostic PCR on the ErdS gene region	M. oryzae	forward
-		NY160	CACAACCATAGCTTGACCGAG		M. oryzae	reverse
-		NY161	CGTTCAGCCCACCTATTGACTAC	Primers used for diagnostic PCR on the ErdH gene region	M. oryzae	forward
-		NY162	CGCTGGCAATGGAAAGGAATC		M. oryzae	reverse
-		NY163	CCGAAATTGACATGAGCGCAAG	ErdS ORF internal primers	M. oryzae	forward
-		NY164	CCGAGAGCATCGTACAGATCAC		M. oryzae	reverse
-		NY165	TTCCATCCACCTCACAGTCTTC	ErdH ORF internal primers	M. oryzae	forward
-		NY166	TCGGCGAGAAGCATGTCATAC		M. oryzae	reverse
